# Supplementary material for: Structural Role of Plasma Membrane Sterols in Osmotic Stress Tolerance of Yeast Saccharomyces cerevisiae
Source: MDPI journal article supplement (doi:10.3390/membranes12121278), 2022-12-17
Supplement: s1 [file s1]

## Supplementary Materials

### Structural Role of Plasma Membrane Sterols in Osmotic Stress Tolerance of Yeast *Saccharomyces cerevisiae*

Svyatoslav S. Sokolov, Marina M. Popova, Peter Pohl, Andreas Horner, Sergey A. Akimov, Natalia A. Kireeva, Dmitry A. Knorre, Oleg V. Batishchev, Fedor F. Severin

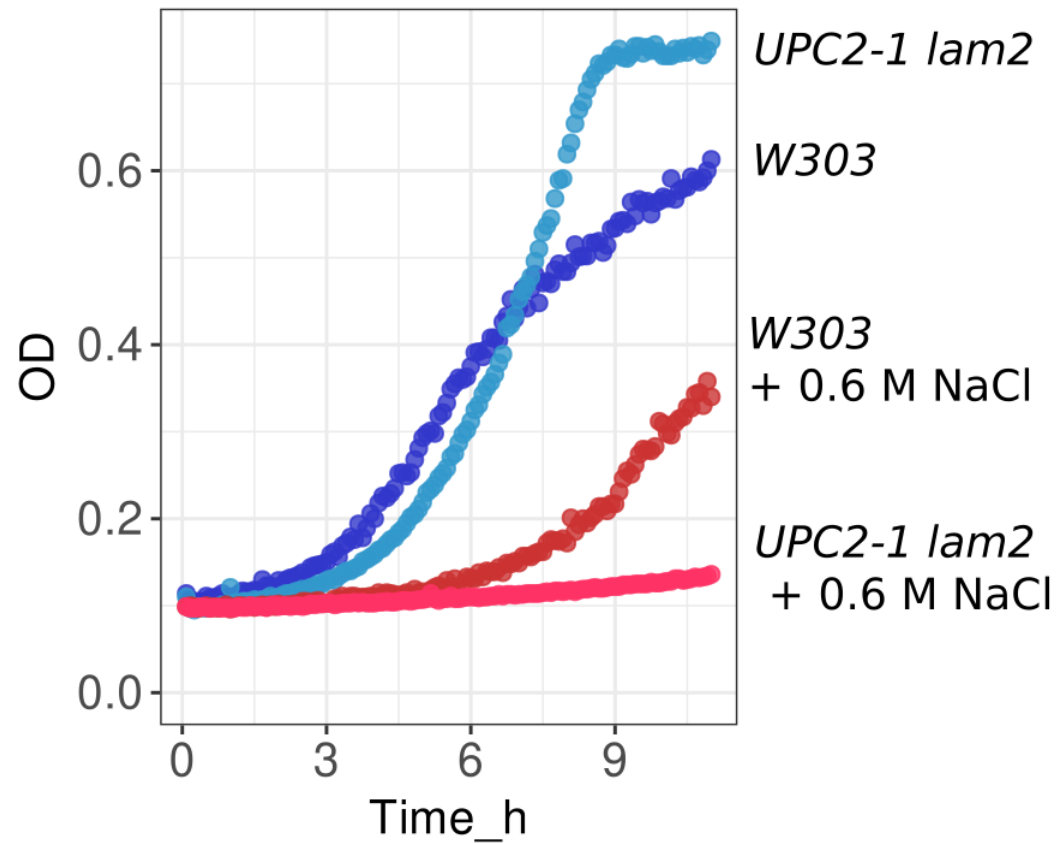

**Figure S1.** Typical growth curves of yeast cells in YPD and in YPD containing 0.6M NaCl.

**Table S1.** Growth rates of a set of mutants in absence and in the presence of the osmolytes.

|                                       | <b>parentalstrain</b> | <b>control</b> | <b>0.6 M NaCl</b> | <b>0.6 M KCl</b> | <b>1.2M sorbitol</b> |
|---------------------------------------|-----------------------|----------------|-------------------|------------------|----------------------|
| <i>BY4741</i>                         | <i>BY4741</i>         | 0.36 ± 0.01    | 0.27 ± 0.03       | 0.3 ± 0.02       | 0.28 ± 0.02          |
| <i>Δhog1</i>                          | <i>BY4741</i>         | 0.38 ± 0.01    | 0.16 ± 0.04       | 0.2 ± 0.01       | 0.09 ± 0.03          |
| <i>Δerg2</i>                          | <i>BY4741</i>         | 0.32 ± 0.02    | 0.25 ± 0.01       | 0.28 ± 0.01      | 0.27 ± 0.02          |
| <i>Δerg3</i>                          | <i>BY4741</i>         | 0.39 ± 0.02    | 0.31 ± 0.04       | 0.39 ± 0.01      | 0.31 ± 0.01          |
| <i>Δerg4</i>                          | <i>BY4741</i>         | 0.33 ± 0.02    | 0.21 ± 0.05       | 0.22 ± 0.01      | 0.25 ± 0.04          |
| <i>Δlam2</i>                          | <i>BY4741</i>         | 0.35 ± 0.02    | 0.28 ± 0.02       | 0.29 ± 0.02      | 0.29 ± 0.03          |
| <i>Δerg2Δlam2</i>                     | <i>BY4741</i>         | 0.36 ± 0.03    | 0.24 ± 0.05       | 0.32 ± 0.02      | 0.22 ± 0.01          |
| <i>Δerg3Δlam2</i>                     | <i>BY4741</i>         | 0.39 ± 0.02    | 0.33 ± 0.02       | 0.37 ± 0.02      | 0.28 ± 0.05          |
| <i>Δerg4Δlam2</i>                     | <i>BY4741</i>         | 0.3 ± 0.02     | 0.06 ± 0.06       | 0.18 ± 0.03      | 0.23 ± 0.03          |
| <i>W303</i>                           | <i>W303</i>           | 0.31 ± 0.06    | 0.27 ± 0.08       | 0.3 ± 0.08       | 0.21 ± 0.05          |
| <i>Δlam1Δlam2Δlam3Δlam4Δosh3</i>      | <i>W303</i>           | 0.28 ± 0.07    | 0.26 ± 0.07       | 0.28 ± 0.05      | 0.21 ± 0.08          |
| <i>Δlam1Δlam2Δlam3Δlam4Δosh4Δosh5</i> | <i>W303</i>           | 0.21 ± 0.05    | 0.17 ± 0.06       | 0.2 ± 0.03       | 0.17 ± 0.05          |
| <i>Δlam1Δlam2Δlam3Δlam4</i>           | <i>W303</i>           | 0.26 ± 0.05    | 0.22 ± 0.09       | 0.24 ± 0.09      | 0.2 ± 0.07           |
| <i>Δlam5Δlam6</i>                     | <i>W303</i>           | 0.35 ± 0.08    | 0.24 ± 0.07       | 0.28 ± 0.06      | 0.19 ± 0.07          |
| <i>Δlam1Δlam2Δlam3Δlam4Δlam5Δlam6</i> | <i>W303</i>           | 0.32 ± 0.06    | 0.27 ± 0.06       | 0.26 ± 0.02      | 0.2 ± 0.07           |
| <i>UPC2-1</i>                         | <i>W303</i>           | 0.31 ± 0.04    | 0.16 ± 0.06       | 0.32 ± 0.08      | 0.34 ± 0.05          |
| <i>UPC2-1Δlam2</i>                    | <i>W303</i>           | 0.28 ± 0.07    | 0.06 ± 0.06       | 0.23 ± 0.03      | 0.2 ± 0.02           |
| <i>Δlam1Δlam2Δlam3Δlam4osh1Δosh2</i>  | <i>W303</i>           | 0.32 ± 0.08    | 0.27 ± 0.05       | 0.29 ± 0.07      | 0.19 ± 0.05          |
| <i>Δerg3</i>                          | <i>W303</i>           | 0.33 ± 0.08    | 0.26 ± 0.06       | 0.3 ± 0.08       | 0.23 ± 0.05          |
| <i>Δlam1Δlam2Δlam3Δlam4Δerg3</i>      | <i>W303</i>           | 0.31 ± 0.07    | 0.26 ± 0.06       | 0.28 ± 0.06      | 0.2 ± 0.08           |
